# Supplementary material for: Core–shell ZnO@TiO2 hexagonal prism heterogeneous structures as photoanodes for boosting the efficiency of quantum dot sensitized solar cells
Source: Royal Society of Chemistry journal article supplement (doi:10.1039/d3dt03144f), 2024-01-01
Supplement: d3dt03144f1.pdf [file d3dt03144f1.pdf]

## Supplementary information

### Core-shell ZnO@TiO<sub>2</sub> hexagonal prism heterogeneous structures as photoanodes for boosting the efficiency of quantum dot sensitized solar cells

Quanhang Li, Tingting Zhang, Donghui Cui, Lin Xu and Fengyan Li\*

Key Laboratory of Polyoxometalate and Reticular Material Chemistry of Ministry of Education, College of Chemistry, Northeast Normal University, Changchun 130024, P. R. China.

\* Corresponding authors.

E-mail addresses: [lify525@nenu.edu.cn](mailto:lify525@nenu.edu.cn).

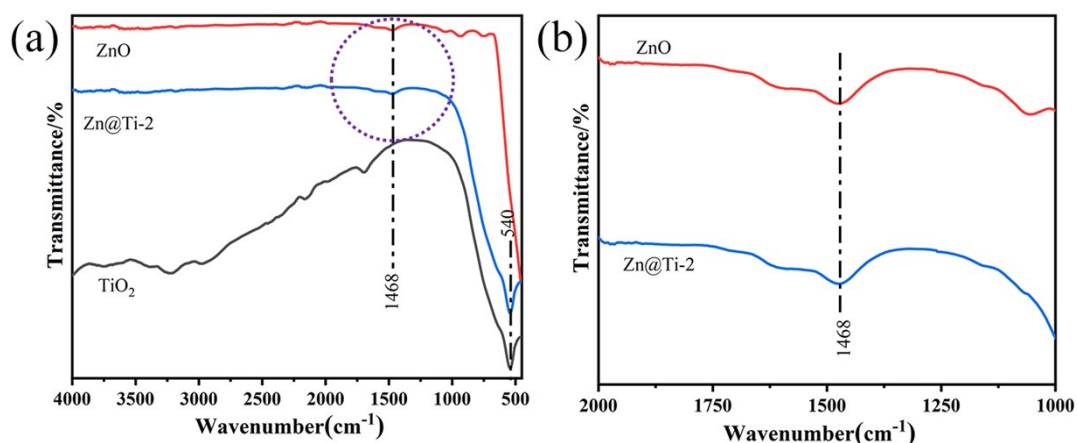

Fig. S1 FTIR spectra of (a) TiO<sub>2</sub>, ZnO and Zn@Ti-2 ; (b) local magnification of FTIR spectra of ZnO and Zn@Ti-2.

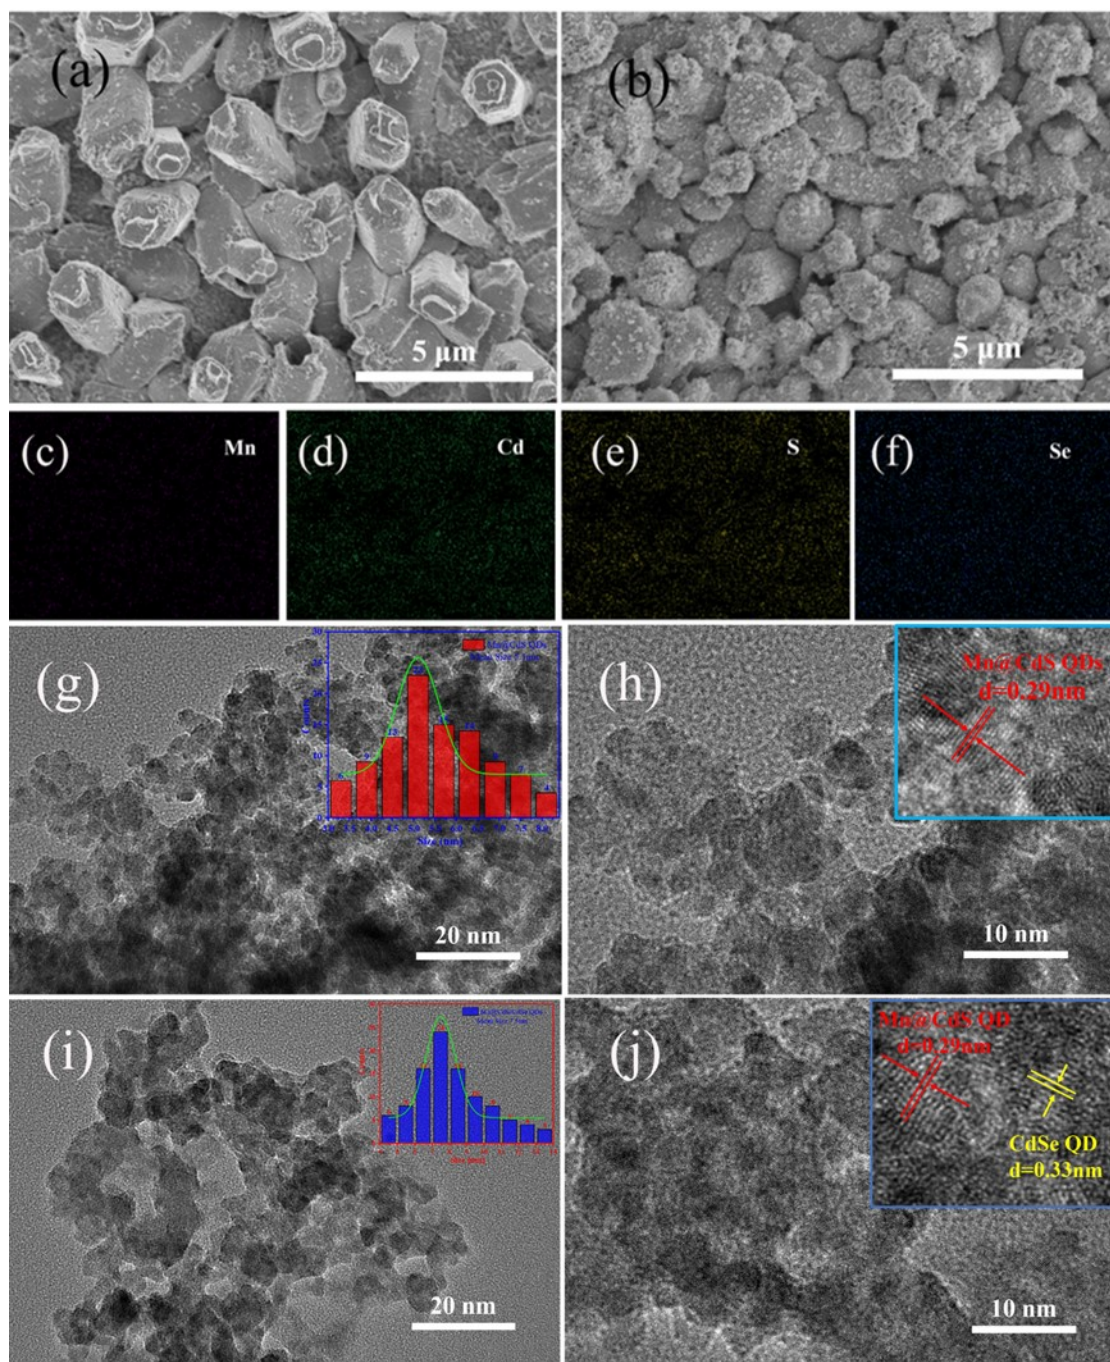

**Fig. S2** SEM images of (a) Zn@Ti-2; (b) Zn@Ti-2 loaded with Mn@CdS/CdSe QDs; (c-f) EDS element mapping of Zn@Ti-2 loaded with Mn@CdS/CdSe QDs; TEM and HRTEM images of (g) Mn@CdS QDs; (h) Mn@CdS/CdSe QDs.

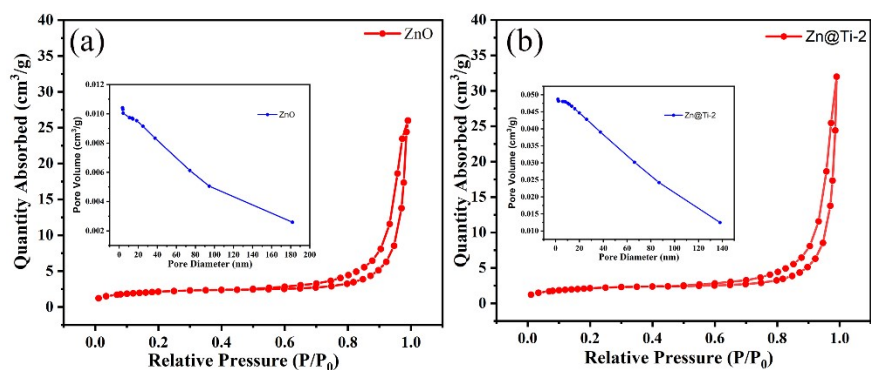

**Fig. S3** Nitrogen adsorption-desorption isotherms of (a) ZnO; (b) Zn@Ti-2 (illustration shows pore size distributions of ZnO and Zn@Ti-2).

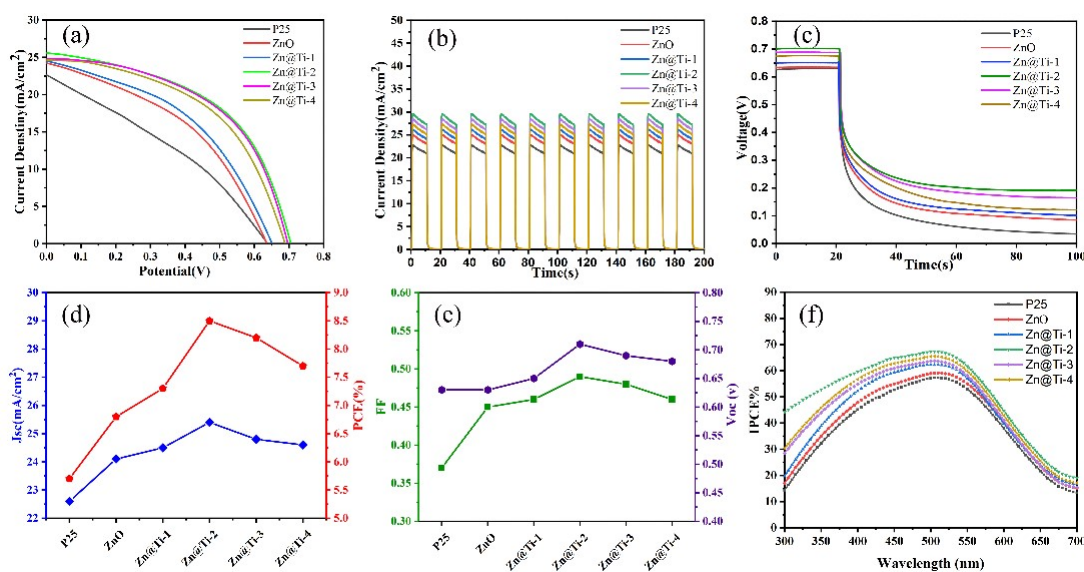

**Fig.S4** (a) J-V curves of QDSSCs with different photoanodes; (b) transient photocurrent responses; (c) OCVD curves; (d) comparison of average  $J_{sc}$  and  $PCE$ ; (e) comparison of average  $FF$  and  $V_{oc}$ ; (f) IPCE comparison chart.

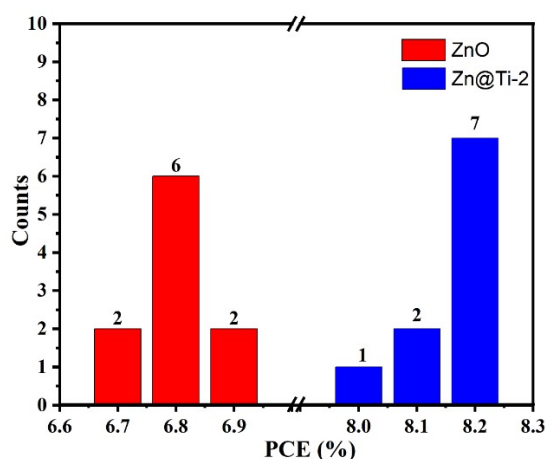

**Fig. S5**  $PCE$  distribution histogram of 10 cells measured for ZnO and Zn@Ti-2.

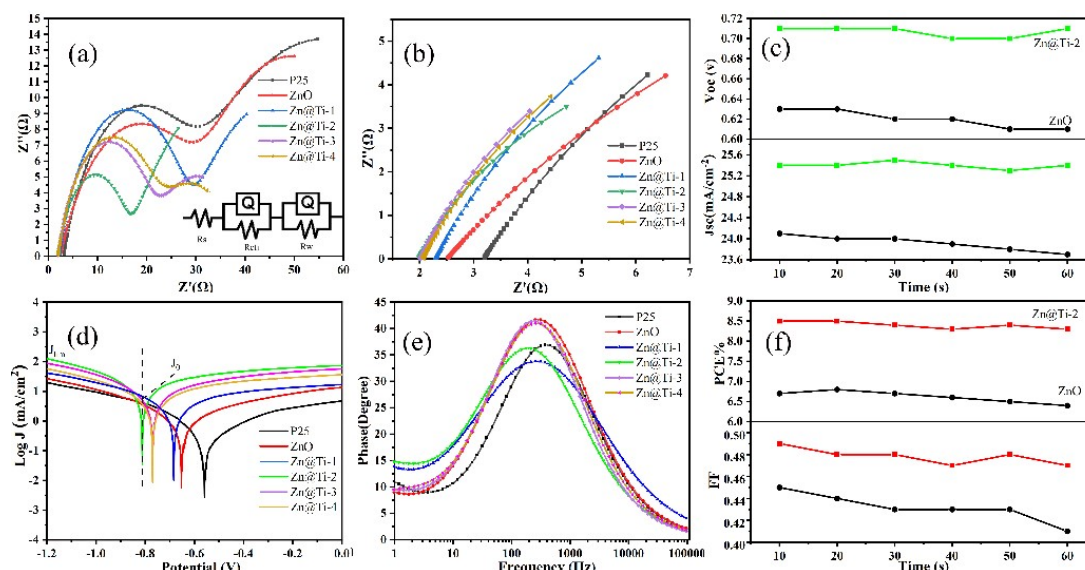

**Fig. S6** (a) Nyquist curve of QDSSCs with different photoanodes; (b) Partial magnification of Nyquist curve; (c) Time function curves of  $V_{oc}$  and  $J_{sc}$  corresponding to ZnO and Zn@Ti-2; (d) Tafel curve of QDSSCs with different photoanodes; (e) Bode phase curve; (f) Time function curves of  $PCE$  and  $FF$  corresponding to ZnO and Zn@Ti-2.

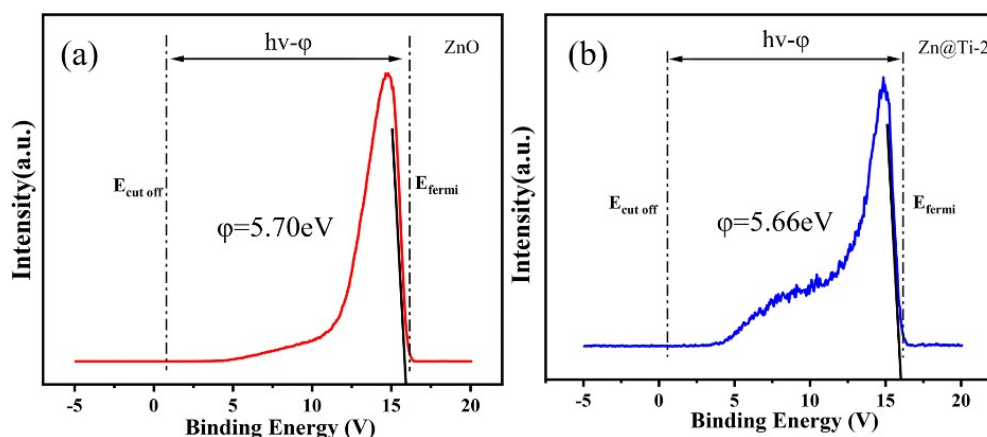

**Fig. S7** Ultraviolet photoelectron spectra of (a) ZnO; (b) Zn@Ti-2.

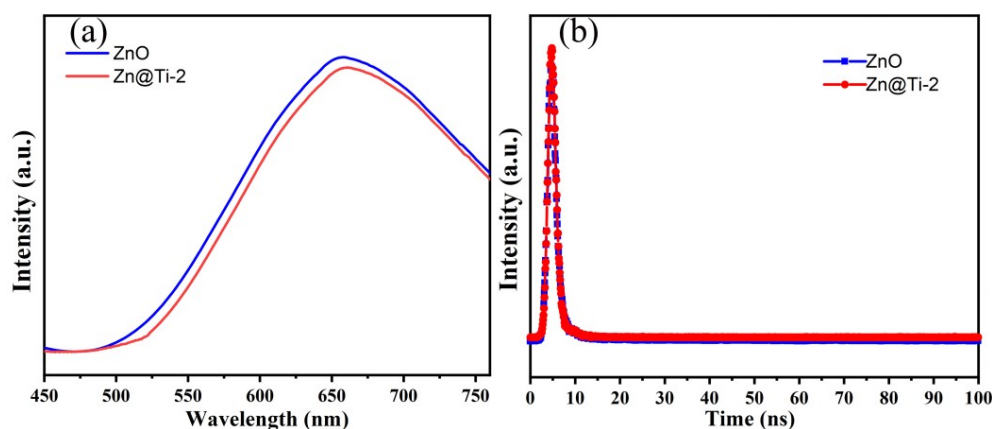

**Fig. S8** (a) PL spectra of ZnO and Zn@Ti-2; and (b) time-resolved PL attenuation spectra of ZnO and Zn@Ti-2.

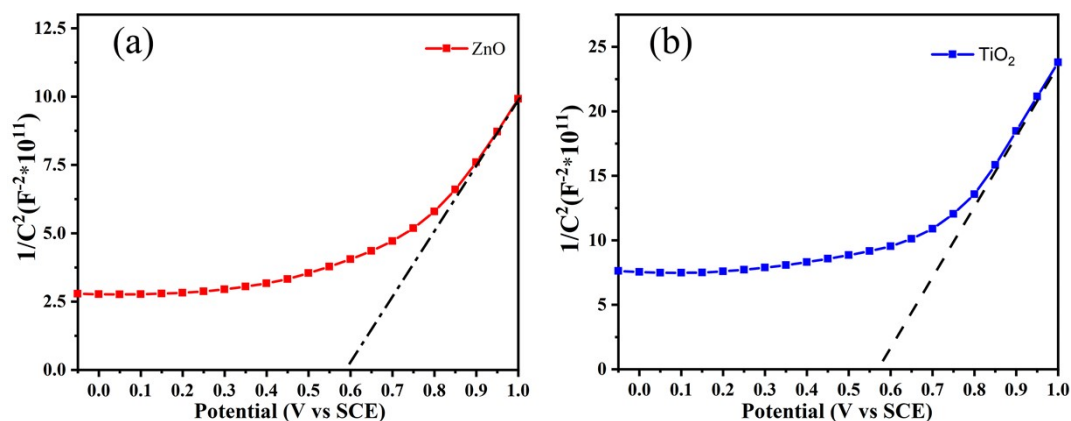Fig. S9 Mott-Schottky diagram of (a) ZnO and (b) TiO<sub>2</sub>.

Table. S1 Comparisons of present photovoltaic values in this study with other reports of similar Photoanode and QDs.

| Photoanode                         | QDs         | PCE   | J <sub>sc</sub> (mA/cm <sup>2</sup> ) | V <sub>oc</sub> (V) | FF   | Year | Ref |
|------------------------------------|-------------|-------|---------------------------------------|---------------------|------|------|-----|
| RGO@TiO <sub>2</sub> NRs           | CdS         | 2.20% | 11.7                                  | 0.45                | 0.42 | 2019 | 1   |
| ZnO                                | CdSe        | 3.05% | 9.28                                  | 0.63                | 0.74 | 2021 | 2   |
| TiO <sub>2</sub>                   | CdS@CdSe    | 5.70% | 18.3                                  | 0.51                | 0.54 | 2023 | 3   |
| RGO@TiO <sub>2</sub> NRs           | CdS         | 2.20% | 11.7                                  | 0.45                | 0.42 | 2019 | 4   |
| TiO <sub>2</sub> /ZnO inverse opal | CdS@CdSe    | 8.18% | 31.2                                  | 0.57                | 0.46 | 2022 | 5   |
| TiO <sub>2</sub>                   | Zn@CdS@CdSe | 5.59% | 21.5                                  | 0.52                | 0.50 | 2022 | 6   |
| TiO <sub>2</sub>                   | CdS@CdSe    | 4.05% | 14.0                                  | 0.48                | 0.60 | 2023 | 7   |

Table S2 Photovoltaic parameters of QDSSCs corresponding to different photoanodes.

|         | J <sub>sc</sub> (mA/cm <sup>2</sup> ) | V <sub>oc</sub> (V) | PCE  | FF   |
|---------|---------------------------------------|---------------------|------|------|
| P25     | 22.6                                  | 0.63                | 5.7% | 0.37 |
| ZnO     | 24.1                                  | 0.63                | 6.8% | 0.45 |
| Zn@Ti-1 | 24.5                                  | 0.65                | 7.3% | 0.46 |
| Zn@Ti-2 | 25.4                                  | 0.71                | 8.5% | 0.49 |
| Zn@Ti-3 | 24.8                                  | 0.69                | 8.2% | 0.48 |
| Zn@Ti-4 | 24.6                                  | 0.68                | 7.7% | 0.46 |

Table S3 Performance parameters of EIS corresponding to different anodes.

|         | R <sub>s</sub> (Ω) | R <sub>ct</sub> (Ω) | J <sub>0</sub> (mA/cm <sup>2</sup> ) | τ <sub>e</sub> (ms) |
|---------|--------------------|---------------------|--------------------------------------|---------------------|
| P25     | 3.2                | 55.86               | 0.49                                 | 7.35                |
| ZnO     | 2.5                | 38.13               | 0.90                                 | 7.22                |
| Zn@Ti-1 | 2.3                | 26.32               | 1.82                                 | 7.05                |
| Zn@Ti-2 | 1.98               | 14.40               | 2.45                                 | 6.40                |
| Zn@Ti-3 | 2.02               | 16.45               | 2.22                                 | 6.65                |
| Zn@Ti-4 | 2.1                | 20.12               | 2.01                                 | 6.80                |

## ARTICLE

**References**

- 1 T. Huang, X. Zhang, H. Wang, X. Chen, L. Wen, M. Huang, Y. Zhong, H. Luo, G. Tang and L. Zhou, *Superlattices and Microstructures*, 2019, **126**, 17-24.
- 2 M. Ramya, T. K. Nideep, V. P. N. Nampoore and M. Kailasnath, *Journal of Materials Science: Materials in Electronics*, 2021, **32**, 17837-17847.
- 3 B. B. Jin, X. J. Liu, L. C. Dong, X. X. Zhong, M. Y. Liang, J. Gan, M. Chen and F. Guo, *Solar Energy Materials and Solar Cells*, 2023, **255**, 112293.
- 4 Y. Liu, Z. Wang, L. Li, S. Gao, D. Zheng, X. Yu, Q. Wu, Q. Yang, D. Zhu, W. Yang and Y. Xiong, *Electrochimica Acta*, 2022, **412**, 140145.
- 5 W. Lv, Y. Lei, J. Deng, J. Fang and W. Huang, *Solar Energy*, 2022, **232**, 398-408.
- 6 S. Monika, M. Mahalakshmi and M. S. Pandian, *Ceramics International*, 2023, **49**, 8820-8826.
- 7 Y. Deng, S. Lu, Z. Xu, J. Zhang, F. Ma and S. Peng, *Science China Materials*, 2020, **63**, 516-523.
